# Supplementary material
Source: HighWire-hosted journal article supplement (https://bmjopen.bmj.com/content/8/1/e019653)
Supplement: inline-supplementary-material-1 [file inline-supplementary-material-1.pdf]

## APPENDIX #1

## MEDLINE SEARCH STRATEGY

Ovid MEDLINE(R) &lt;1946 to August Week 1 2017&gt;

| #  | Searches                                                                                                                                                                                                                                                                                                                                                                                                                                                                                                                                                                                                                                                                                                                                 | Results | Type     |
|----|------------------------------------------------------------------------------------------------------------------------------------------------------------------------------------------------------------------------------------------------------------------------------------------------------------------------------------------------------------------------------------------------------------------------------------------------------------------------------------------------------------------------------------------------------------------------------------------------------------------------------------------------------------------------------------------------------------------------------------------|---------|----------|
| 1  | exp Oceanic Ancestry Group/                                                                                                                                                                                                                                                                                                                                                                                                                                                                                                                                                                                                                                                                                                              | 8871    | Advanced |
| 2  | ("pacific islander" or "native hawaiian" or Hawaii or "ni'ihau" or niihau or "kaua'i" or kauai or "o'ahu" or oahu or "moloka'i" or molokai or "lana'i" or lanai or "kaho'olawe" or kahoolawe or maui).ti,ab.                                                                                                                                                                                                                                                                                                                                                                                                                                                                                                                             | 7465    | Advanced |
| 3  | ("austral islands" or australasia or "caroline islands" or carolinian or chamorro or chuuk or chuukese or "cook islands" or "easter island" or fiji or fijian or "futuna island" or guam or guamanian or "i-kiribati" or kiribati or kosrae or kosraean or "mariana islander" or "mariana islands" or "marshall islands" or marshallese or melanesia or melanesian or micronesia or micronesian or "new caledonia" or niue or "ni-vanuatu" or "pacific islander" or "pacific islands" or palau or palauan or "papua new guinea" or "papua new guinean" or "phoenix islands" or "pitcairn islands" or pohnpei or pohnpeian or polynesia or polynesian or "rapa nui" or saipan or saipanese or "american samoa" or samoa or samoan).ti,ab. | 14366   | Advanced |
| 4  | 1 or 2 or 3                                                                                                                                                                                                                                                                                                                                                                                                                                                                                                                                                                                                                                                                                                                              | 28011   | Advanced |
| 5  | exp Community-Based Participatory Research/                                                                                                                                                                                                                                                                                                                                                                                                                                                                                                                                                                                                                                                                                              | 3400    | Advanced |
| 6  | (action adj2 (inquiry or "oriented participatory research" or research or science)).ti,ab.                                                                                                                                                                                                                                                                                                                                                                                                                                                                                                                                                                                                                                               | 3657    | Advanced |
| 7  | cbpr.ti,ab.                                                                                                                                                                                                                                                                                                                                                                                                                                                                                                                                                                                                                                                                                                                              | 740     | Advanced |
| 8  | ((communit* or consumer*) adj2 (based or centered or driven or engaged or involved or partnered or wide) adj1 (research or studies or study)).ti,ab.                                                                                                                                                                                                                                                                                                                                                                                                                                                                                                                                                                                     | 4565    | Advanced |
| 9  | ((participatory or "patient-centered" or "patient-centric") adj2 research).ti,ab.                                                                                                                                                                                                                                                                                                                                                                                                                                                                                                                                                                                                                                                        | 3442    | Advanced |
| 10 | 5 or 6 or 7 or 8 or 9                                                                                                                                                                                                                                                                                                                                                                                                                                                                                                                                                                                                                                                                                                                    | 12560   | Advanced |
| 11 | 4 and 10                                                                                                                                                                                                                                                                                                                                                                                                                                                                                                                                                                                                                                                                                                                                 | 292     | Advanced |
| 12 | exp Oceanic Ancestry Group/                                                                                                                                                                                                                                                                                                                                                                                                                                                                                                                                                                                                                                                                                                              | 8871    | Advanced |

|    |                                                                                                                                                                                                                                                                                                                                                                                                                                                                                                                                                                                                                                                                                                                                       |       |          |
|----|---------------------------------------------------------------------------------------------------------------------------------------------------------------------------------------------------------------------------------------------------------------------------------------------------------------------------------------------------------------------------------------------------------------------------------------------------------------------------------------------------------------------------------------------------------------------------------------------------------------------------------------------------------------------------------------------------------------------------------------|-------|----------|
| 13 | ("pacific islander" or "native hawaiian" or Hawaii or "ni'ihau" or niihau or "kaua'i" or kauai or "o'ahu" or oahu or "moloka'i" or molokai or "lana'i" or lanai or "kaho'olawe" or kahoolawe or maui).mp.                                                                                                                                                                                                                                                                                                                                                                                                                                                                                                                             | 10566 | Advanced |
| 14 | ("austral islands" or australasia or "caroline islands" or carolinian or chamorro or chuuk or chuukese or "cook islands" or "easter island" or fiji or fijian or "futuna island" or guam or guamanian or "i-kiribati" or kiribati or kosrae or kosraean or "mariana islander" or "mariana islands" or "marshall islands" or marshallese or melanesia or melanesian or micronesia or micronesian or "new caledonia" or niue or "ni-vanuatu" or "pacific islander" or "pacific islands" or palau or palauan or "papua new guinea" or "papua new guinean" or "phoenix islands" or "pitcairn islands" or pohnpei or pohnpeian or polynesia or polynesian or "rapa nui" or saipan or saipanese or "american samoa" or samoa or samoan).mp. | 20125 | Advanced |
| 15 | 12 or 13 or 14                                                                                                                                                                                                                                                                                                                                                                                                                                                                                                                                                                                                                                                                                                                        | 36468 | Advanced |
| 16 | exp Community-Based Participatory Research/                                                                                                                                                                                                                                                                                                                                                                                                                                                                                                                                                                                                                                                                                           | 3400  | Advanced |
| 17 | (action adj2 (inquiry or "oriented participatory research" or research or science)).mp.                                                                                                                                                                                                                                                                                                                                                                                                                                                                                                                                                                                                                                               | 3852  | Advanced |
| 18 | cbpr.mp.                                                                                                                                                                                                                                                                                                                                                                                                                                                                                                                                                                                                                                                                                                                              | 761   | Advanced |
| 19 | ((communit* or consumer*) adj2 (based or centered or driven or engaged or involved or partnered or wide) adj1 (research or studies or study)).mp.                                                                                                                                                                                                                                                                                                                                                                                                                                                                                                                                                                                     | 4635  | Advanced |
| 20 | ((participatory or "patient-centered" or "patient-centric") adj2 research).mp.                                                                                                                                                                                                                                                                                                                                                                                                                                                                                                                                                                                                                                                        | 5569  | Advanced |
| 21 | 16 or 17 or 18 or 19 or 20                                                                                                                                                                                                                                                                                                                                                                                                                                                                                                                                                                                                                                                                                                            | 12931 | Advanced |
| 22 | 15 and 21                                                                                                                                                                                                                                                                                                                                                                                                                                                                                                                                                                                                                                                                                                                             | 326   | Advanced |
| 23 | limit 22 to yr="2000 - 2017"                                                                                                                                                                                                                                                                                                                                                                                                                                                                                                                                                                                                                                                                                                          | 304   | Advanced |
